# Supplementary material for: Tunable protein synthesis by transcript isoforms in human cells
Source: eLife journal article supplement (doi:10.7554/elife.10921), 2016-01-06
Supplement: supp [file elife_poa_e10921_Figure_1_figure_supplement_3.docx]

| Sample | Total reads | Post Clipping | Not RMSK | Not abundant | Tophat aligned  pairs | Mapping % of adapter clipped reads |
| --- | --- | --- | --- | --- | --- | --- |
| Cyto-1 | 184571870 | 184394131 | 110443081 | 46808660 | 39444698 | 21.4 |
| 80S-1 | 77832535 | 77763887 | 47173217 | 35021876 | 29581633 | 38.0 |
| Poly2-1 | 94505643 | 55554743 | 33393345 | 28224338 | 18554893 | 33.4 |
| Poly3-1 | 70654970 | 66996924 | 43625896 | 39925211 | 33756095 | 50.4 |
| Poly4-1 | 120407187 | 118010756 | 64339055 | 51551420 | 42320689 | 35.9 |
| Poly5-1 | 77502399 | 77105982 | 52596164 | 50203535 | 44741724 | 58.0 |
| Poly6-1 | 67810172 | 67480927 | 49607622 | 48281815 | 42640870 | 63.2 |
| Poly7-1 | 65740748 | 65656549 | 52853501 | 51264692 | 41428630 | 63.1 |
| Poly8+-1 | 84006988 | 83821434 | 61099728 | 53784630 | 46227156 | 55.1 |
| Cyto-2 | 214597641 | 213605106 | 122388341 | 54622582 | 46525302 | 21.8 |
| 80S-2 | 119286475 | 119225856 | 86528280 | 59000453 | 50347420 | 42.2 |
| Poly2-2 | 81544474 | 81433804 | 57011940 | 49311039 | 39916333 | 49.0 |
| Poly3-2 | 81801897 | 81742403 | 56294854 | 52775456 | 43711784 | 53.5 |
| Poly4-2 | 88173435 | 88111229 | 65039098 | 63502818 | 56081954 | 63.6 |
| Poly5-2 | 80707087 | 80679339 | 65291810 | 64287718 | 56970334 | 70.6 |
| Poly6-2 | 84072925 | 84024620 | 61633743 | 60922115 | 53403533 | 63.6 |
| Poly7-2 | 86608778 | 86451161 | 67558265 | 66638099 | 59449911 | 68.8 |
| Poly8+-2 | 76817619 | 76699814 | 63724356 | 61345215 | 54243009 | 70.7 |

**Figure 1-figure supplement 3:** Read Tracking Across the Sequencing Analysis Pipeline. Not RMSK refers to reads not mapping to repeatmasker sequences, and not abundant is reads not mapping to rRNA and ChrM, etc (Methods).
