# Supplementary material for: Tunable protein synthesis by transcript isoforms in human cells
Source: eLife journal article supplement (doi:10.7554/elife.10921), 2016-01-06

A

Human embryo  
RNA-seq data

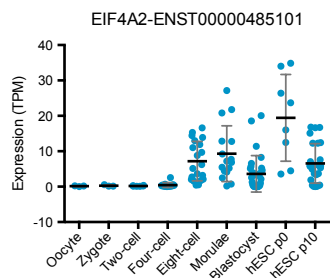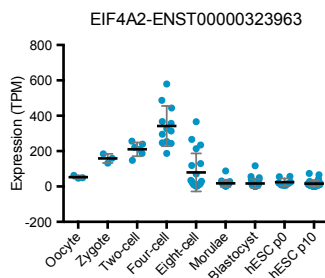

TrIP-seq  
polysome data

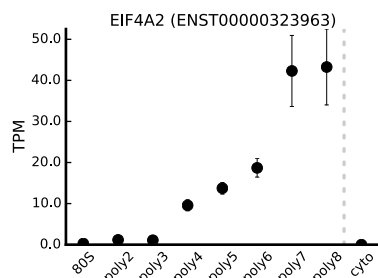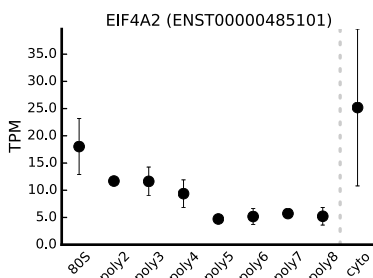

Human embryo  
RNA-seq data

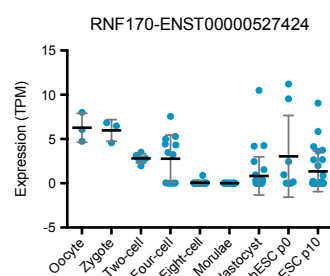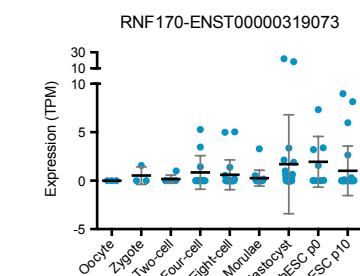

TrIP-seq  
polysome data

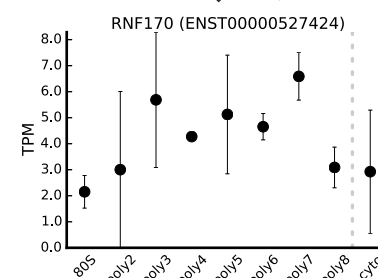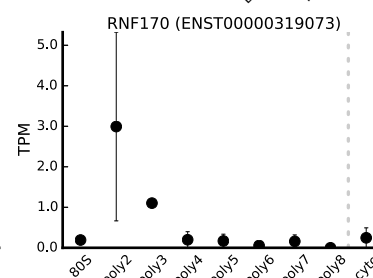

Human embryo  
RNA-seq data

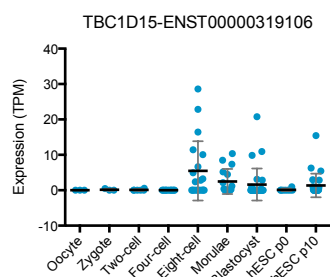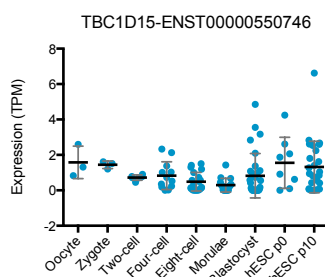

TrIP-seq  
polysome data

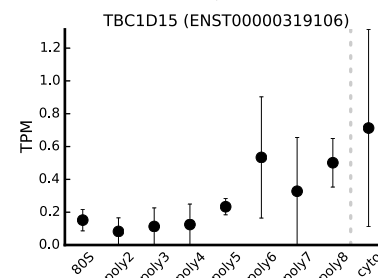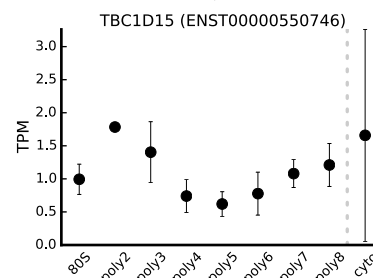

Supplement: supp [file elife_poa_e10921_Figure_4_figure_supplement_2.pdf › elife_poa_e10921_Figure_4_figure_supplement_2.pdf]
