# Supplementary figures and images for: Tunable protein synthesis by transcript isoforms in human cells
Source: eLife journal article supplement (doi:10.7554/elife.10921), 2016-01-06

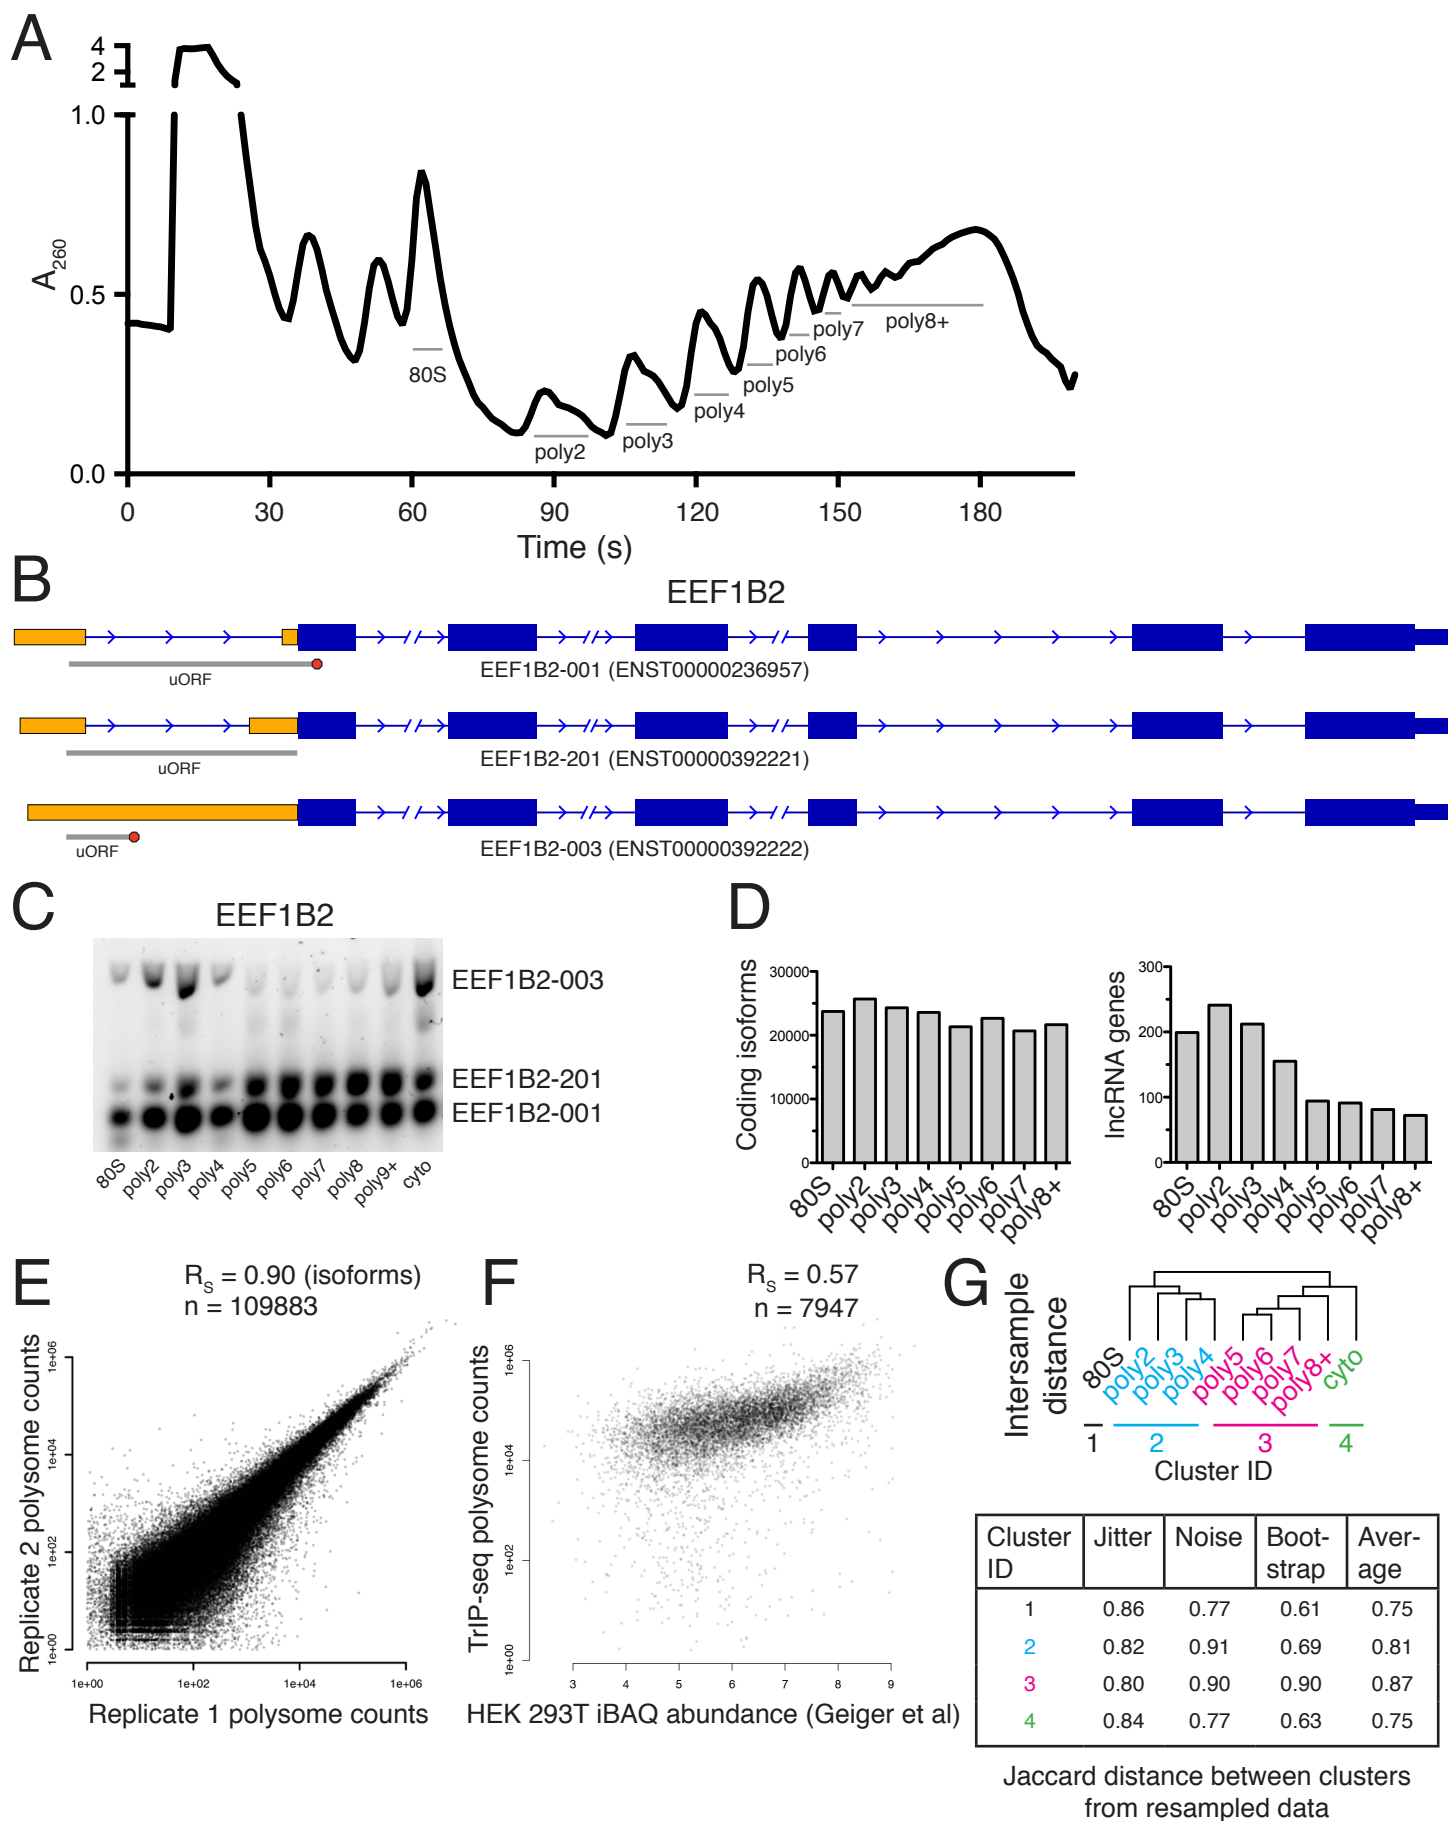

Supplement: supp [file elife_poa_e10921_Figure_1_figure_supplement_1.pdf › elife_poa_e10921_Figure_1_figure_supplement_1.pdf]

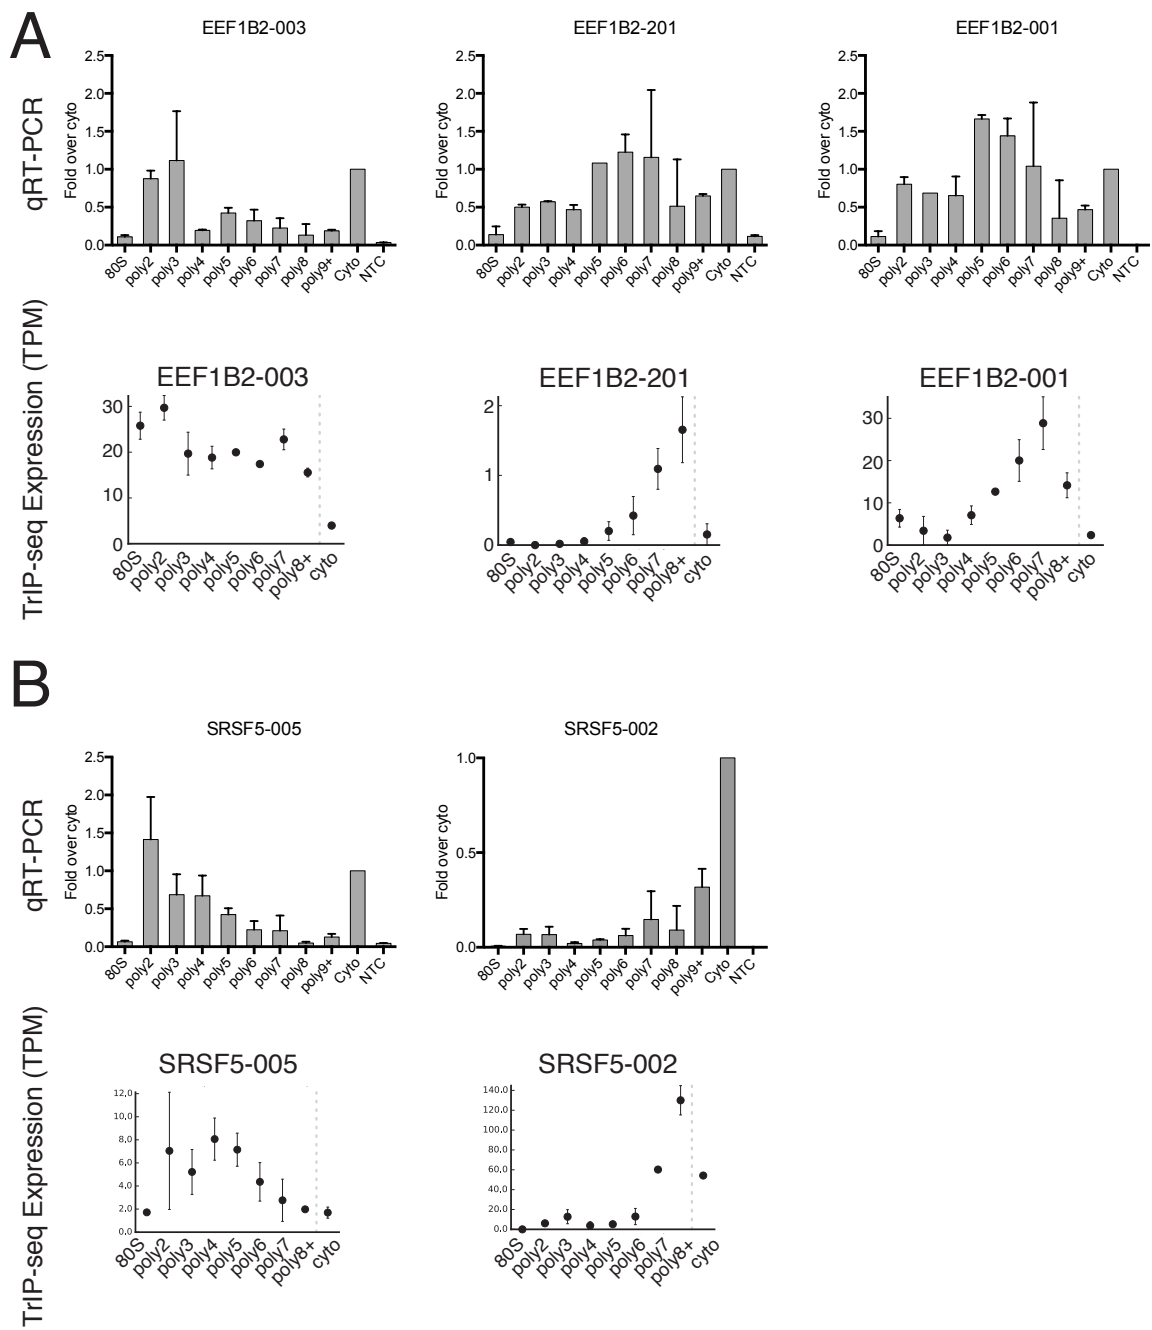

Supplement: supp [file elife_poa_e10921_Figure_1_figure_supplement_2.pdf › elife_poa_e10921_Figure_1_figure_supplement_2.pdf]

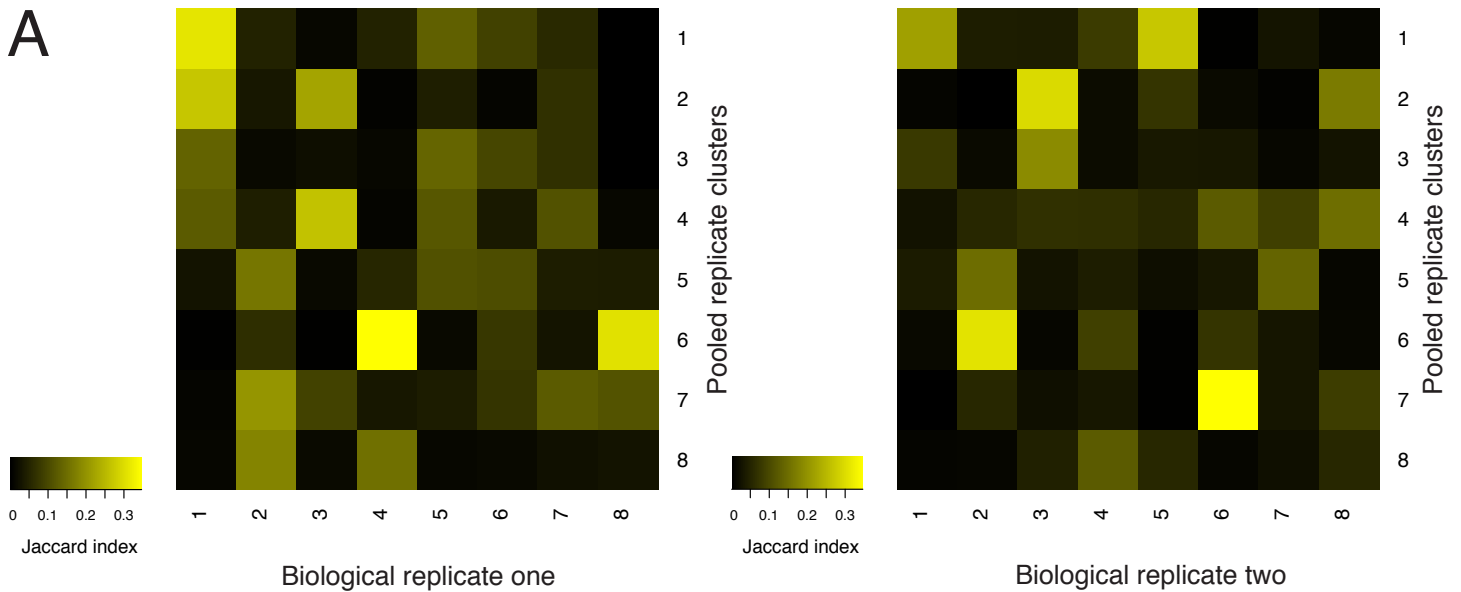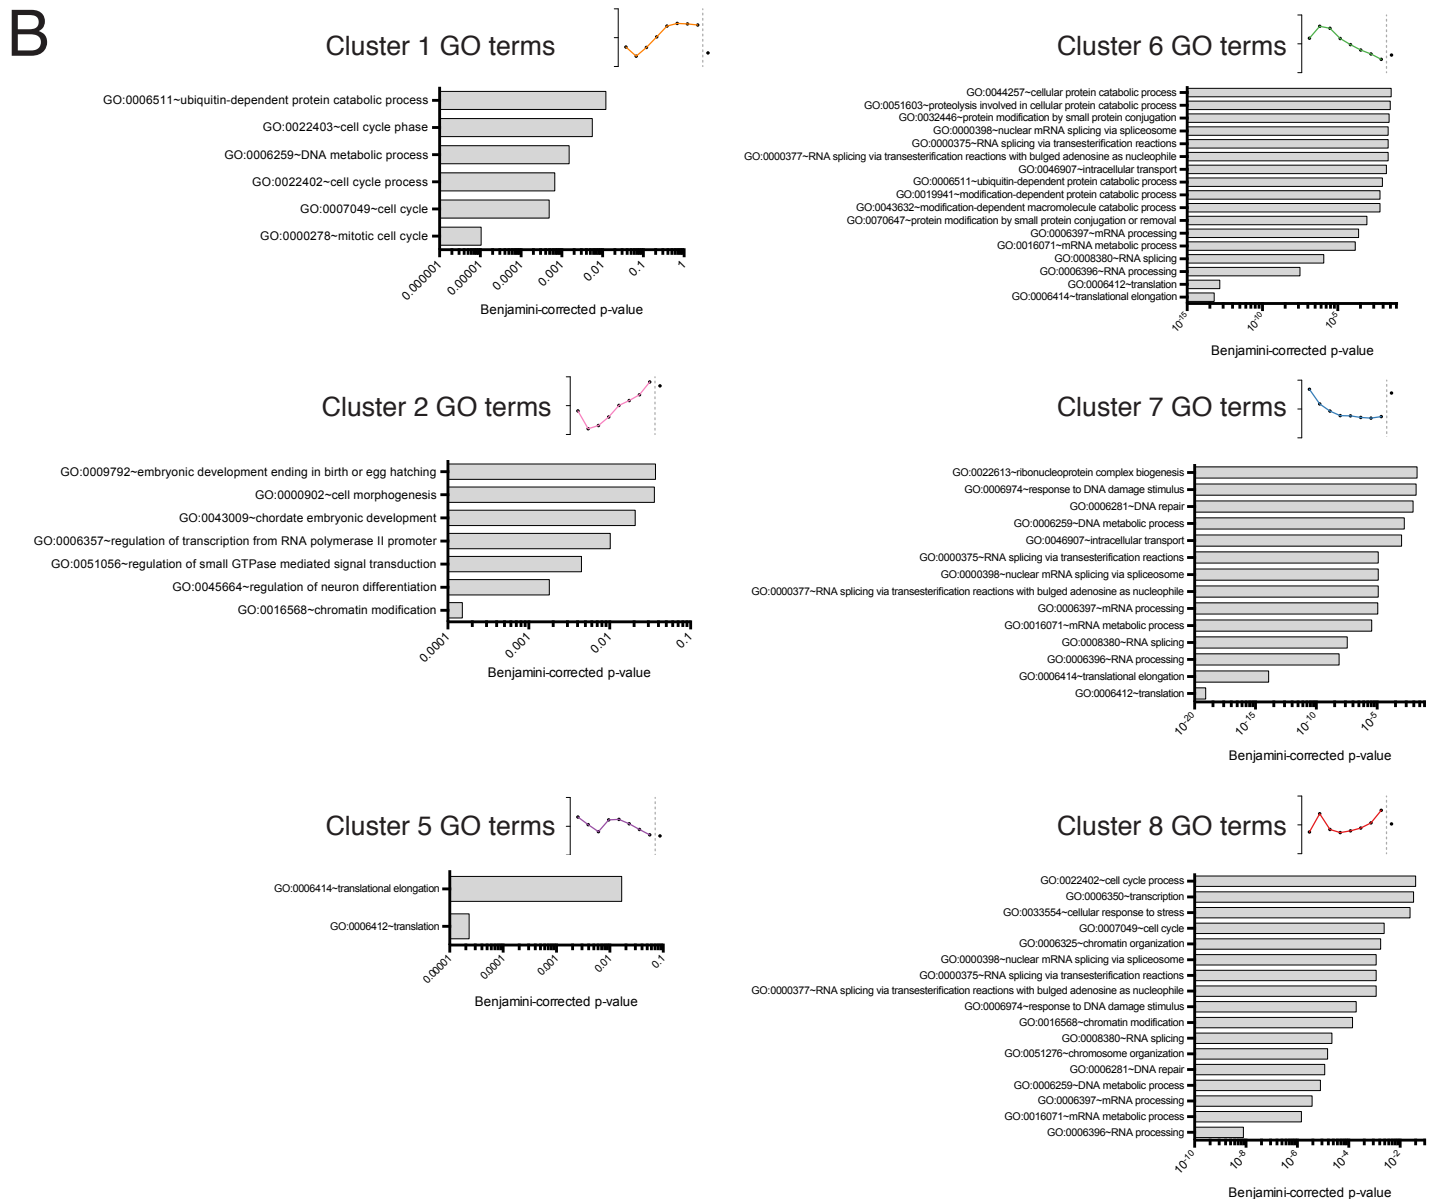

Floor & Doudna Figure S2

Supplement: supp [file elife_poa_e10921_Figure_2_figure_supplement_1.pdf › elife_poa_e10921_Figure_2_figure_supplement_1.pdf]

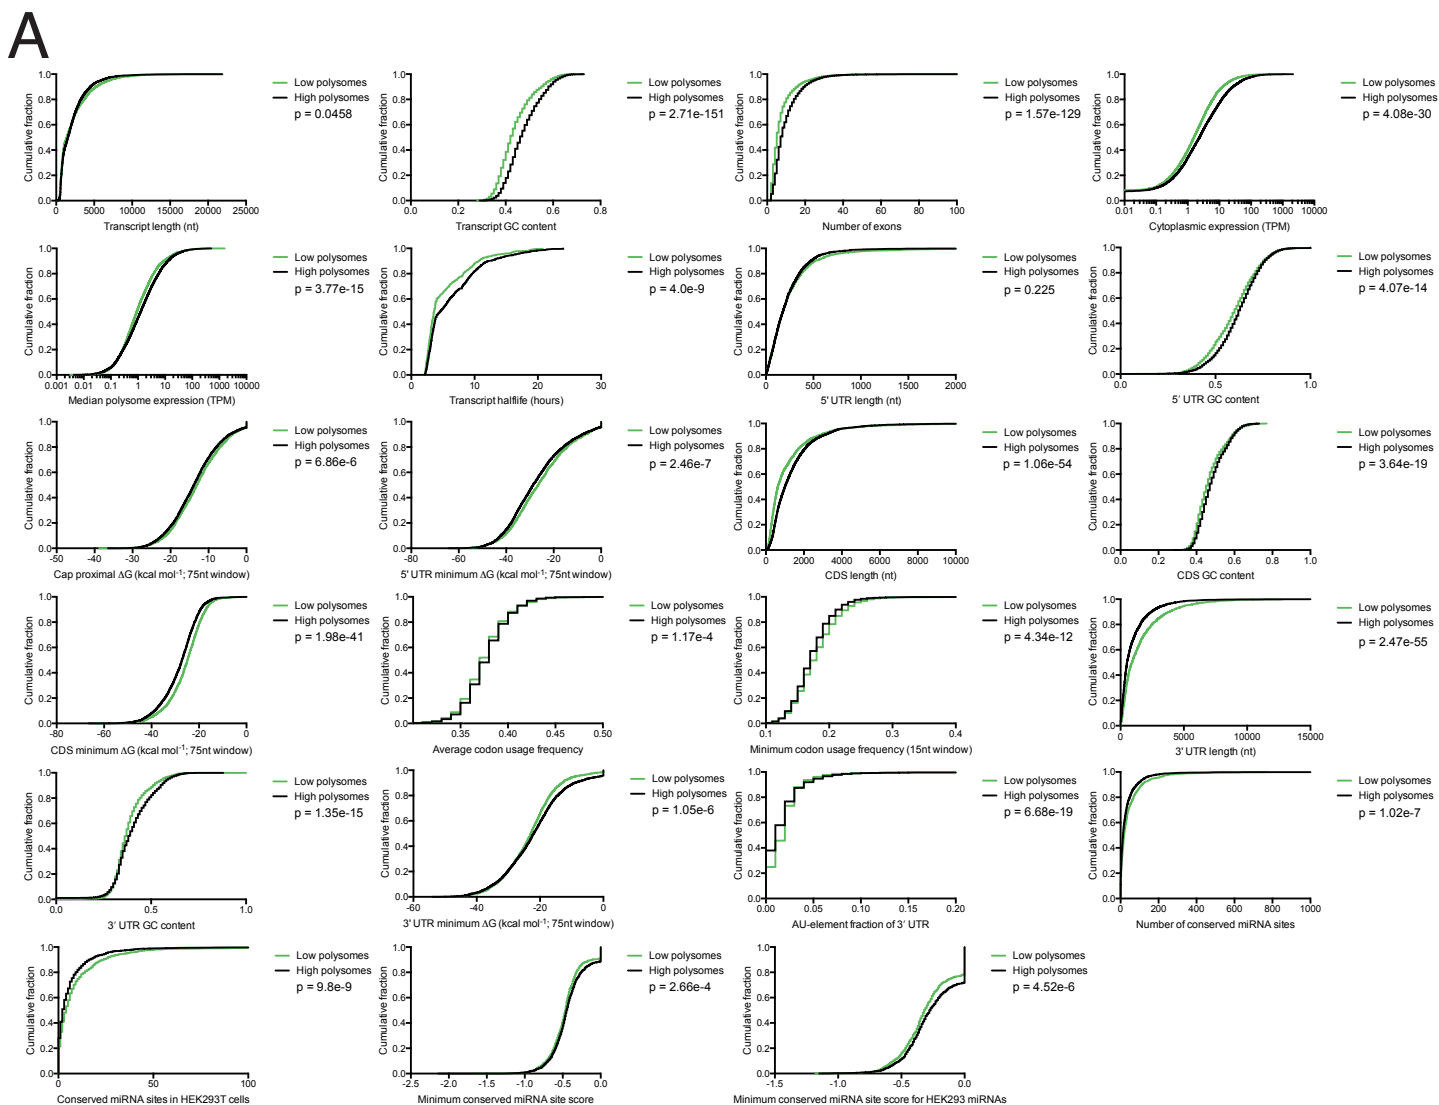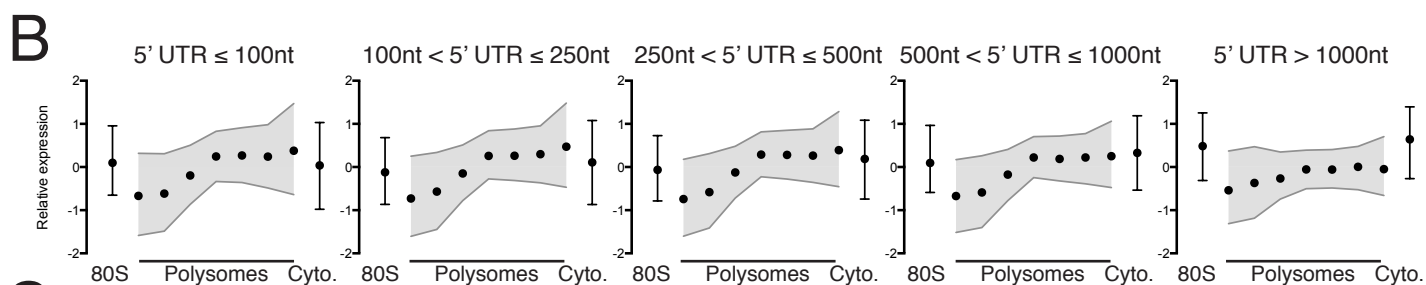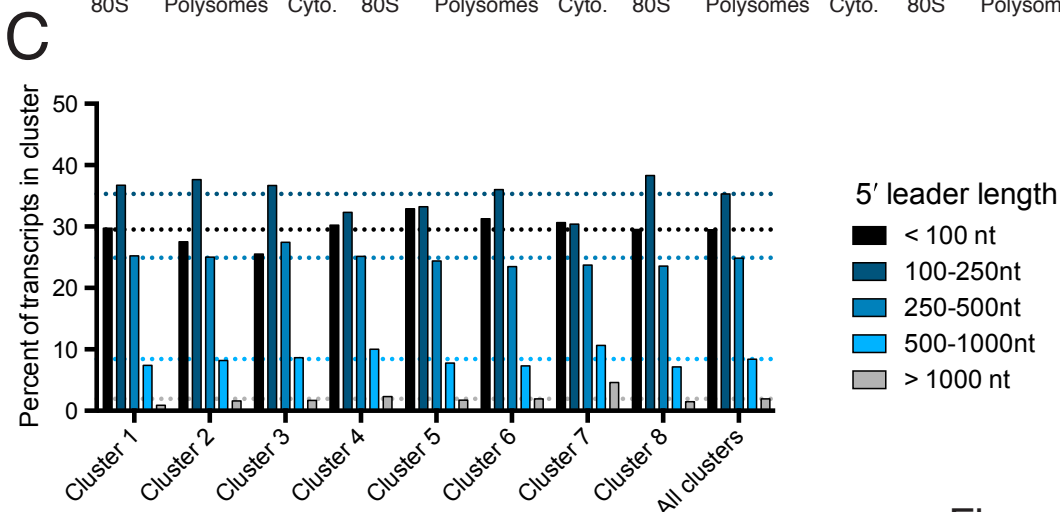

Supplement: supp [file elife_poa_e10921_Figure_3_figure_supplement_1.pdf › elife_poa_e10921_Figure_3_figure_supplement_1.pdf]

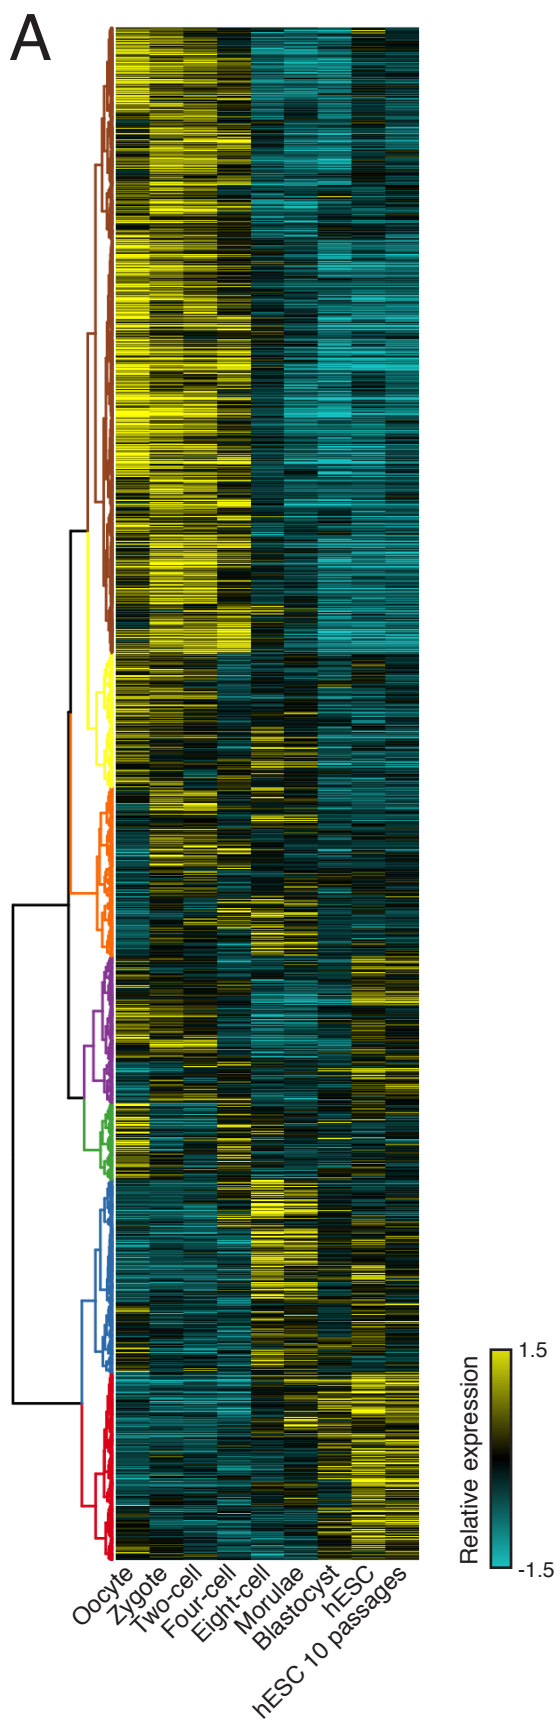

Supplement: supp [file elife_poa_e10921_Figure_4_figure_supplement_1.pdf › elife_poa_e10921_Figure_4_figure_supplement_1.pdf]

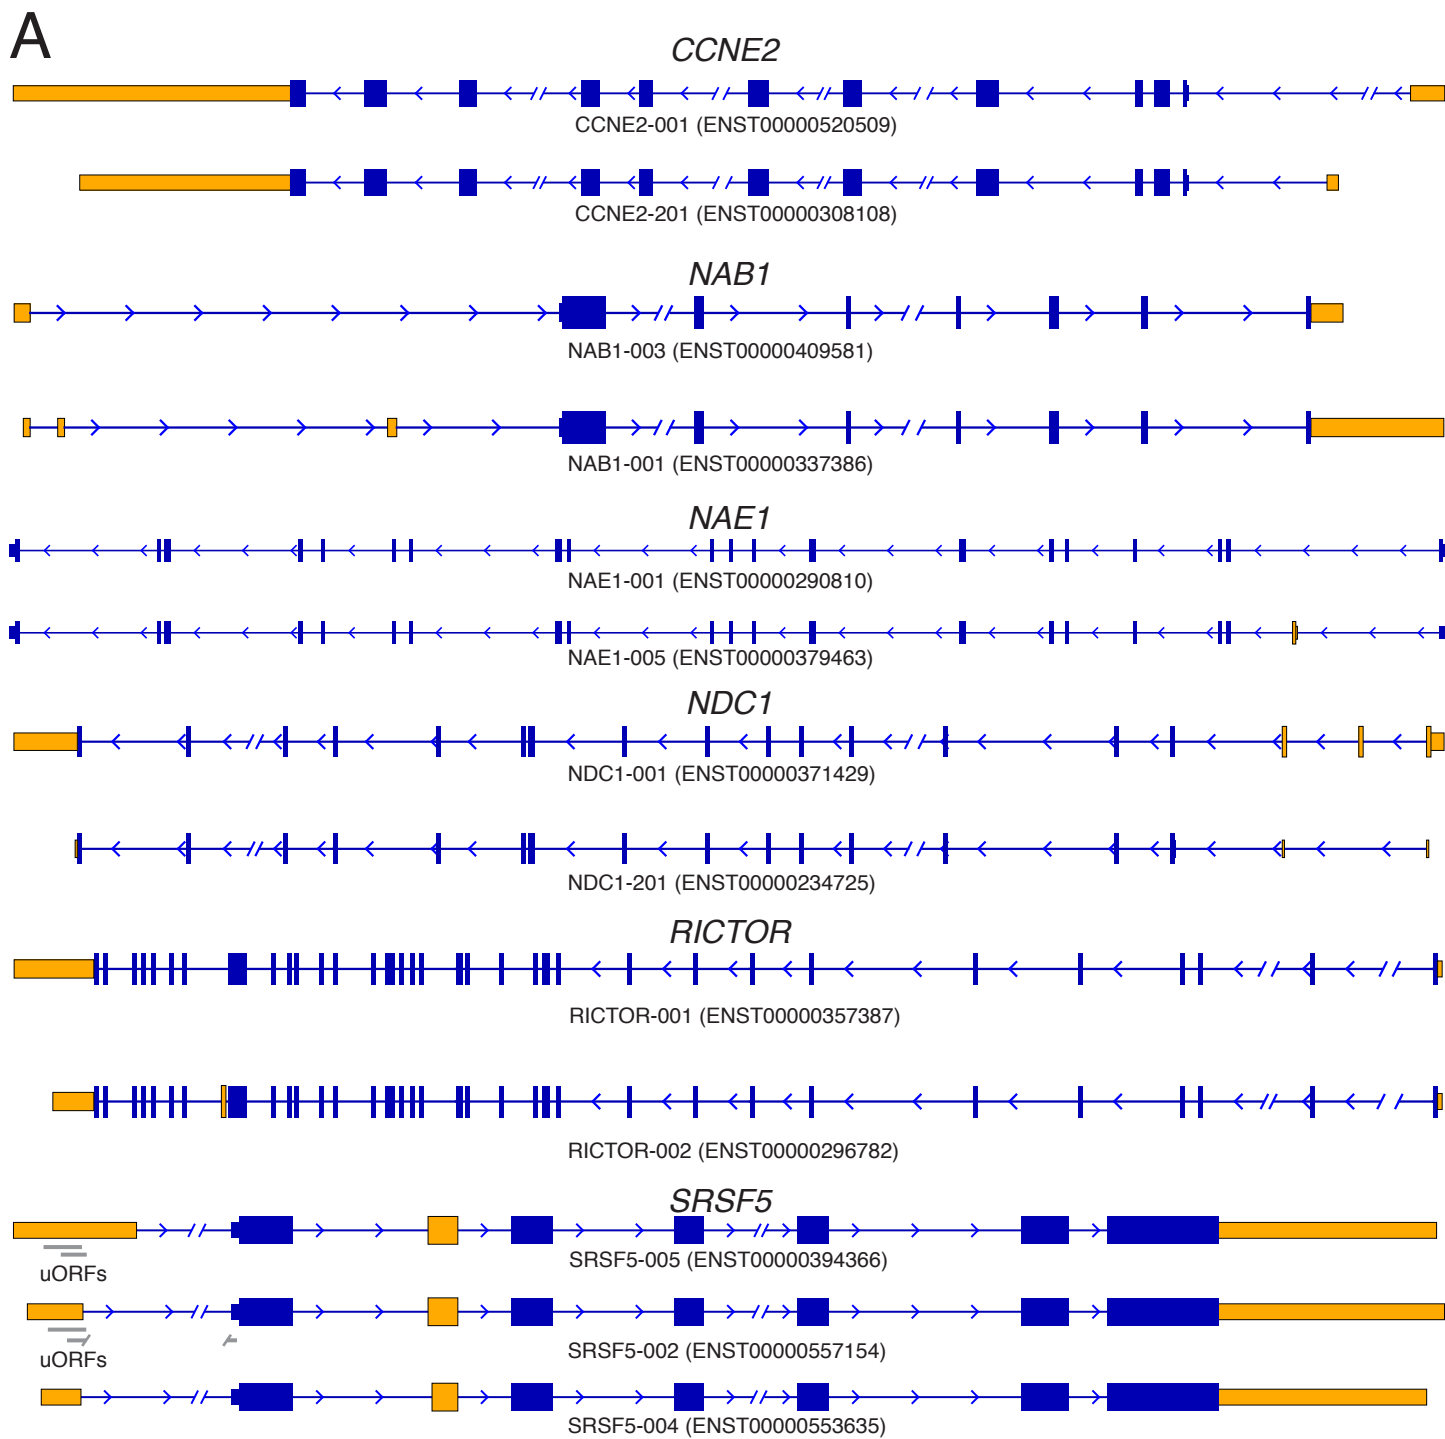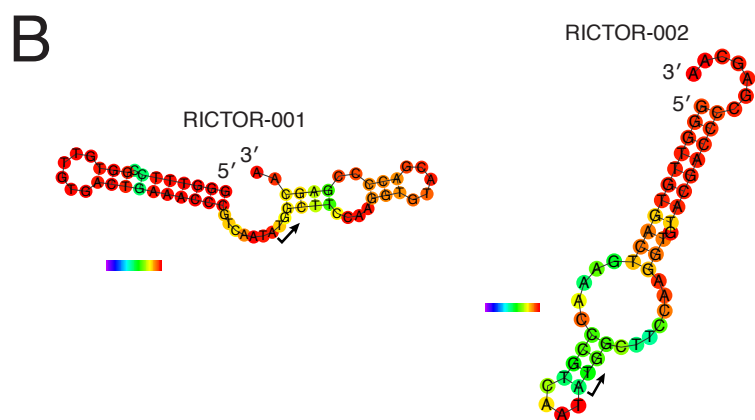

Supplement: supp [file elife_poa_e10921_Figure_5_figure_supplement_1.pdf › elife_poa_e10921_Figure_5_figure_supplement_1.pdf]

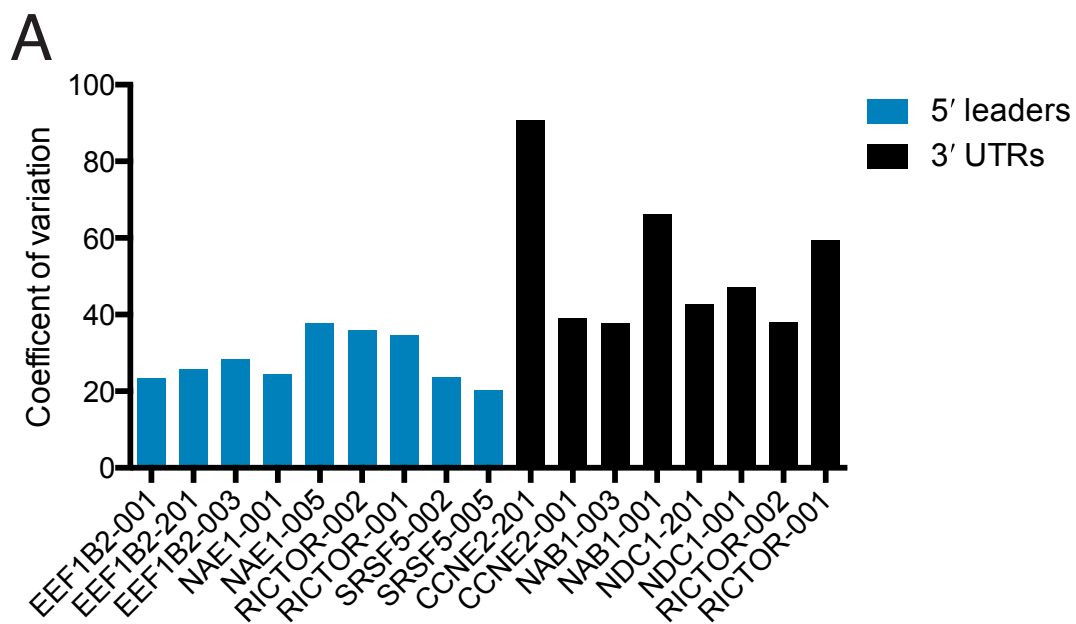

Supplement: supp [file elife_poa_e10921_Figure_6_figure_supplement_1.pdf › elife_poa_e10921_Figure_6_figure_supplement_1.pdf]
